# Supplementary material for: Resistin Enhances VCAM-1 Expression and Monocyte Adhesion in Human Osteoarthritis Synovial Fibroblasts by Inhibiting MiR-381 Expression through the PKC, p38, and JNK Signaling Pathways
Source: MDPI journal article supplement (doi:10.3390/cells9061369), 2020-06-01
Supplement: s1 [file s1]

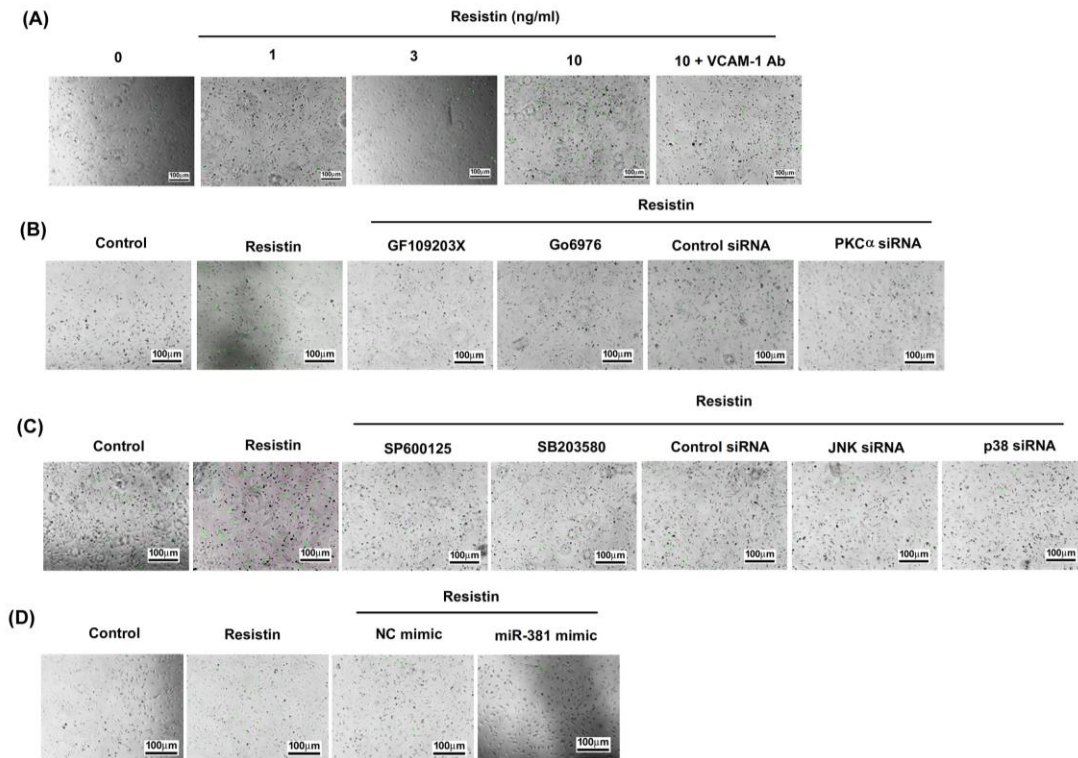

**Figure 1.** Resistin-enhanced VCAM-1 expression and monocyte adhesion by inhibiting miR-381 synthesis via the PKC, p38, and JNK signaling pathways. **(A)** OASFs were incubated with resistin (0, 1, 3, and 10 ng/mL) only or resistin 10 ng/mL + VCAM-1 antibody for 24 h. **(B–D)** OASFs were pretreated with a PKC inhibitor (GF109203x), a specific PKCα/β inhibitor (Gö6976), JNK (SP600125) and p38 (SB203580), or transfected with PKCα, JNK, p38, miR-381 mimic, NC mimic and control siRNA, then incubated with resistin for 24 h. Adherence of THP-1 cells to cultured OASFs was photographed by fluorescence microscopy, THP-1 cells were subsequently added to OASFs for 1 h. Adherence of THP-1 cells to cultured OASFs was photographed by fluorescence microscopy and quantified ( $n = 4$ ).

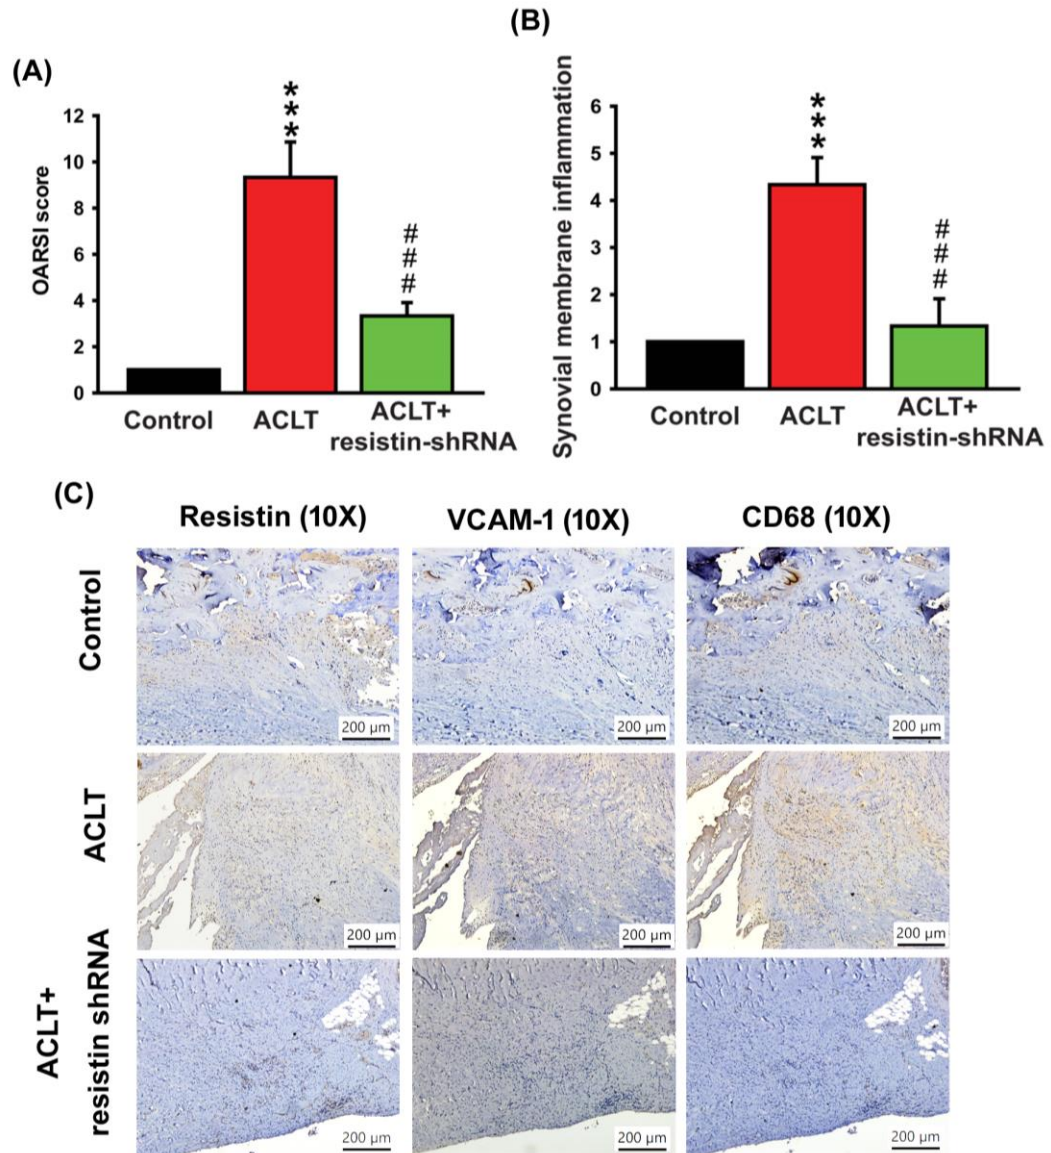

**Figure 2.** Resistin shRNA ameliorates histologic severity of OA. (A) OARSI score. (B) synovitis membrane inflammation. (C) Specimens from the control knee, ACLT knee, and resistin-shRNA-transfected ACLT knee were immunostained with resistin, VCAM-1, and CD68 (monocyte surface marker). \*  $p < 0.05$ ; \*\*  $p < 0.01$ ; \*\*\*  $p < 0.001$  compared with control knees; #  $p < 0.05$ ; ##  $p < 0.01$ ; ###  $p < 0.001$  compared with the ACLT group.
